# Supplementary material for: Society for Immunotherapy of Cancer (SITC) consensus definitions for resistance to combinations of immune checkpoint inhibitors with targeted therapies
Source: PubMed Central journal article supplement — J Immunother Cancer. 2023 Mar 13;11(3):e005923. doi: 10.1136/jitc-2022-005923 (PMC10016252; doi:10.1136/jitc-2022-005923), 2023-03-13
Supplement: jitc-2022-005923supp001.pdf [file jitc-2022-005923supp001.pdf]

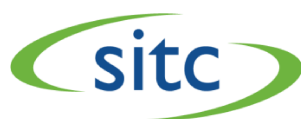

Society for Immunotherapy of Cancer

## Combination Immunotherapy Resistance Workshop

May 7, 2021

Working Group Participants

### **Checkpoint Inhibitor Combinations Working Group**

**Chair:** Harriet Kluger, MD – *Yale Cancer Center*

**Co-Organizer:** Elad Sharon, MD, MPH – *National Cancer Institute*

Carl Barrett, PhD – *AstraZeneca*

Peter Bross, MD – *US Food and Drug Administration*

Justin Gainor, MD – *Massachusetts General Hospital*

Omid Hamid, MD – *The Angeles Clinic and Research Institute*

Michael Hurwitz, MD, PhD – *Yale Cancer Center*

Adnan Jaigirdar, MD – *US Food and Drug Administration*

Theresa LaVallee, PhD – *Parker Institute for Cancer Immunotherapy*

Rebecca Moss, MD – *Bristol Myers Squibb*

Marc Theoret, MD – *US Food and Drug Administration*

Roberta Zappasodi, PhD – *Weill Cornell University*

### **Checkpoint Inhibitors with Chemotherapy Combinations Working Group**

**Chair:** Ryan Sullivan, MD – *Massachusetts General Hospital*

**Co-Organizer:** Naiyer Rizvi, MD – *SyntheKine*

Foluso O. Ademuyiwa, MD, MPH – *Washington University School of Medicine*

Alex Cao, PhD – *Merck*

Helen Chen, MD – *National Cancer Institute*

Robert Ferris, MD, PhD – *University of Pittsburgh Medical Center*

Sarah Goldberg, MD, MPH – *Yale University*

Matthew Hellman, MD – *AstraZeneca*

Steven Lemery, MD, MHS – *US Food and Drug Administration*

Ranee Mehra, MD – *University of Maryland*

Jong Chul Park, MD – *Massachusetts General Hospital*

Ina Rhee, MD, PhD – *Genentech*

Harpreet Singh, MD – *US Food and Drug Administration*

### **Checkpoint Inhibitors with Tumor-targeted and Anti-angiogenic Therapy Combinations Working Group**

**Chair:** Hussein Tawbi, MD, PhD – *MD Anderson Cancer Center*

**Co-Organizer:** Michael Atkins, MD – *Georgetown University*

Oladimeji Akinboro, MD, MPH – *US Food and Drug Administration*

Paolo Ascierto, MD – *National Tumor Institute Fondazione*

Lola Fashoyin-Aje, MD, MPH – *US Food and Drug Administration*

David Feltquate, MD, PhD – *Palleon Pharmaceuticals*

James Gulley, MD, PhD, FACP – *National Cancer Institute*

Doug Johnson, MD, MSCI – *Vanderbilt University Medical Center*

Nikhil Khushalani, MD – *Moffitt Cancer Center*

Julie Schneider, PhD – *US Food and Drug Administration*

Jeffrey Sosman, MD – *Northwestern University*

Timothy Yap, MD, PhD – *MD Anderson Cancer Center*
